# BOOK REVIEWS

Burnell R. Brown, Jr., M.D., Editor

## Books Received

| Title & Edition                                                                                                                                                                                                                                                                                                                                                                                                                                                                                | Author/Editor                                                             | Publisher                                                                           |       |         |
|------------------------------------------------------------------------------------------------------------------------------------------------------------------------------------------------------------------------------------------------------------------------------------------------------------------------------------------------------------------------------------------------------------------------------------------------------------------------------------------------|---------------------------------------------------------------------------|-------------------------------------------------------------------------------------|-------|---------|
|                                                                                                                                                                                                                                                                                                                                                                                                                                                                                                |                                                                           | Address, Name, Year                                                                 | Pages | Price   |
| <b>The Pharmacological Basis of Therapeutics 6th</b>                                                                                                                                                                                                                                                                                                                                                                                                                                           | Alfred Goodman Gilman<br>Louis S. Goodman<br>Alfred Gilman<br>(Editors)   | New York, New York<br>Macmillan Publishing<br>Co.,<br>1980                          | 1,843 | \$45.00 |
| <i>The primary objectives of this book are the correlation of pharmacology with related medical sciences; the reinterpretation of the actions and the uses of drugs from the viewpoint of important advances in medicine; the placing of emphasis on the applications of pharmacodynamics to therapeutics.</i>                                                                                                                                                                                 |                                                                           |                                                                                     |       |         |
| <b>Chemical Diagnosis of Disease</b>                                                                                                                                                                                                                                                                                                                                                                                                                                                           | Stanley S. Brown<br>Frederick L. Mitchell<br>Donald S. Young<br>(Editors) | Amsterdam,<br>the Netherlands<br>Elsevier/North-Holland<br>Biomedical Press<br>1980 | 1,374 | \$74.75 |
| <i>This book has been written to meet the demand for authoritative and integrated information on the topic. It should prove valuable as a reference source for physicians, surgeons and laboratory scientists, and as a textbook for both postgraduates and undergraduate students of medicine and biochemistry.</i>                                                                                                                                                                           |                                                                           |                                                                                     |       |         |
| <b>Diagnostic Techniques in Pulmonary Disease—Part One</b>                                                                                                                                                                                                                                                                                                                                                                                                                                     | Marvin A. Sackner.<br>(Editor)                                            | New York, New York<br>Marcel Dekker, Inc.<br>1980                                   | 560   | \$49.50 |
| <i>This book is a reference on the diagnosis, classification, management, and prognosis of lung disease. The techniques presented in this book range from the needs of general internists dealing with lung disease to the very sophisticated techniques that have only recently become available to clinical pulmonary specialists.</i>                                                                                                                                                       |                                                                           |                                                                                     |       |         |
| <b>Obstetric Anaesthesia and Analgesia</b>                                                                                                                                                                                                                                                                                                                                                                                                                                                     | Donald D. Moir                                                            | New York, New York<br>Macmillan Publishing,<br>Co., Inc.<br>1980                    | 326   | \$43.95 |
| <i>This book is written for the practicing anesthetist, and particularly for the anesthetist in training, who is in the process of acquiring experience in obstetric anesthesia and analgesia after a period of general anesthetic work. The book provides a succinct yet comprehensive account of the role of anesthesia and analgesia in modern obstetrics.</i>                                                                                                                              |                                                                           |                                                                                     |       |         |
| <b>1980 Yearbook of Anesthesia</b>                                                                                                                                                                                                                                                                                                                                                                                                                                                             | James E. Eckenhoff, M.D., D.Sc.<br>(Editor)                               | Chicago, Illinois<br>Yearbook Medical<br>Publishers, Inc.<br>1980                   | 363   | \$27.50 |
| <i>The Yearbook series provides the essence of the best of the recent international medical literature in condensed form. The material is selected by distinguished editors who critically review more than 500,000 journal articles each year.</i>                                                                                                                                                                                                                                            |                                                                           |                                                                                     |       |         |
| <b>Body Temperature Control—<br/>in Anaesthesia, Surgery and Intensive Care</b>                                                                                                                                                                                                                                                                                                                                                                                                                | Anita Holdcroft                                                           | London WC1R 4SG<br>Bailliere Tindall<br>Division of Cassell Ltd.<br>1980            | 179   | \$29.95 |
| <i>This book provides a rational basis for monitoring and controlling skin and deep body temperature and brings together the previously scattered information on body temperature changes, induced and spontaneous, that occur during anesthesia, surgery, and intensive care.</i>                                                                                                                                                                                                             |                                                                           |                                                                                     |       |         |
| <b>Microcirculation<br/>Volume 3</b>                                                                                                                                                                                                                                                                                                                                                                                                                                                           | Gabor Kaley<br>Burton M. Altura<br>(Editors)                              | Baltimore, Maryland<br>University Park Press<br>1980                                | 531   | \$65.00 |
| <i>This book examines the effects of physical factors on pathophysiology, host defense and circulatory shock and inflammation, hypertension and vascular disease, in vivo methods, quantitative studies in single vessels, in vitro methods, electronmicroscopic techniques, and future trends in microcirculation research. It critically evaluates work done in the past, describes the present state of the art, and points out future directions that seem profitable and challenging.</i> |                                                                           |                                                                                     |       |         |

Books Received (*Continued*)

| Title & Edition                                                             | Author/Editor     | Publisher                                                                                                                       |       |         |
|-----------------------------------------------------------------------------|-------------------|---------------------------------------------------------------------------------------------------------------------------------|-------|---------|
|                                                                             |                   | Address, Name, Year                                                                                                             | Pages | Price   |
| <b>Anaesthesia for Cardiac Surgery and Allied Procedures</b><br>2nd Edition | M. A. Branchwaite | St. Louis, Missouri<br>Blackwell Scientific<br>Publications<br>USA Distributors<br>Blackwell Mosby Book<br>Distributors<br>1980 | 220   | \$35.75 |

*With the change and advancement in many important aspects in cardiac surgery, this edition has been revised accordingly and incorporates additional material on new and recent developments. It is a work which should be read by all those who are concerned with cardiovascular problems, either in the operating theater or intensive care unit.*
